RESEARCH ARTICLE

# Identification and Characterization of Microsatellite Markers Derived from the Whole Genome Analysis of *Taenia solium*

Mónica J. Pajuelo<sup>1</sup>, María Eguiluz<sup>1</sup>, Eric Dahlstrom<sup>2</sup>, David Requena<sup>1</sup>, Frank Guzmán<sup>1</sup>, Manuel Ramirez<sup>1</sup>, Patricia Sheen<sup>1</sup>, Michael Frace<sup>3</sup>, Scott Sammons<sup>3</sup>, Vitaliano Cama<sup>4</sup>, Sarah Anzick<sup>2</sup>, Dan Bruno<sup>2</sup>, Siddhartha Mahanty<sup>2</sup>, Patricia Wilkins<sup>4</sup>, Theodore Nash<sup>2</sup>, Armando Gonzalez<sup>5</sup>, Héctor H. García<sup>6,7</sup>, Robert H. Gilman<sup>8</sup>, Steve Porcella<sup>2</sup>, Mirko Zimic<sup>1\*</sup>, Cysticercosis Working Group in Peru<sup>†</sup>

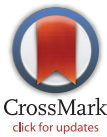

 OPEN ACCESS

**Citation:** Pajuelo MJ, Eguiluz M, Dahlstrom E, Requena D, Guzmán F, Ramirez M, et al. (2015) Identification and Characterization of Microsatellite Markers Derived from the Whole Genome Analysis of *Taenia solium*. PLoS Negl Trop Dis 9(12): e0004316. doi:10.1371/journal.pntd.0004316

**Editor:** Klaus Brehm, University of Würzburg, GERMANY

**Received:** August 31, 2015

**Accepted:** November 24, 2015

**Published:** December 23, 2015

**Copyright:** This is an open access article, free of all copyright, and may be freely reproduced, distributed, transmitted, modified, built upon, or otherwise used by anyone for any lawful purpose. The work is made available under the [Creative Commons CC0](https://creativecommons.org/licenses/by/4.0/) public domain dedication.

**Data Availability Statement:** The set of contigs corresponding to the genome of the Huancayo-cysts, the set of contigs corresponding to the assembled genome of the Puno-proglottid and the set of contigs corresponding to the hybrid assembly created from both the Huancayo and Puno tissue genome assemblies is available together at Genbank under the project ID PRJNA183343.

**Funding:** This work was partially supported by the Fogarty International Center/NIH Training Grants D43TW001140 and D43TW006581. HHG. is supported by a Wellcome Trust Senior International

**1** Laboratorio de Bioinformática y Biología Molecular, Laboratorios de Investigación y Desarrollo, Facultad de Ciencias y Filosofía, Universidad Peruana Cayetano Heredia, Lima, Peru, **2** Genomics Unit, Research Technologies Section, Rocky Mountain Laboratories, NIAID, NIH, Hamilton, Montana, United States of America, **3** Biotechnology Core Facility Branch, National Center for Emerging and Zoonotic Infectious Diseases, Centers for Disease Control and Prevention, Atlanta, Georgia, United States of America, **4** Division of Parasitic Diseases and Malaria, Center for Global Health, Centers for Disease Control and Prevention, Atlanta, Georgia, United States of America, **5** Facultad de Medicina Veterinaria, Universidad Nacional Mayor de San Marcos, Lima, Peru, **6** Departamento de Microbiología, Facultad de Ciencias y Filosofía, Universidad Peruana Cayetano Heredia, Lima Peru, **7** Instituto Nacional de Ciencias Neurológicas. Lima, Peru, **8** Department of International Health, Bloomberg School of Public Health, Johns Hopkins University, Baltimore, Maryland, United States of America

<sup>†</sup> Membership of the Cysticercosis Working Group in Peru is provided in the Acknowledgments.

\* [Mirko.zimic@upch.pe](mailto:Mirko.zimic@upch.pe)

## Abstract

### Background

Infections with *Taenia solium* are the most common cause of adult acquired seizures worldwide, and are the leading cause of epilepsy in developing countries. A better understanding of the genetic diversity of *T. solium* will improve parasite diagnostics and transmission pathways in endemic areas thereby facilitating the design of future control measures and interventions. Microsatellite markers are useful genome features, which enable strain typing and identification in complex pathogen genomes. Here we describe microsatellite identification and characterization in *T. solium*, providing information that will assist in global efforts to control this important pathogen.

### Methods

For genome sequencing, *T. solium* cysts and proglottids were collected from Huancayo and Puno in Peru, respectively. Using next generation sequencing (NGS) and *de novo* assembly, we assembled two draft genomes and one hybrid genome. Microsatellite sequences were identified and 36 of them were selected for further analysis. Twenty *T. solium* isolates were collected from Tumbes in the northern region, and twenty from Puno in the southern region of Peru. The size-polymorphism of the selected microsatellites was determined with

Research Fellowship in Public Health and Tropical Medicine. The funders had no role in study design, data collection and analysis or interpretation; in writing the report or in the decision to submit this manuscript for publication.

**Competing Interests:** The authors have declared that no competing interests exist.

multi-capillary electrophoresis. We analyzed the association between microsatellite polymorphism and the geographic origin of the samples.

## Results

The predicted size of the hybrid (proglottid genome combined with cyst genome) *T. solium* genome was 111 MB with a GC content of 42.54%. A total of 7,979 contigs (>1,000 nt) were obtained. We identified 9,129 microsatellites in the Puno-proglottid genome and 9,936 in the Huancayo-cyst genome, with 5 or more repeats, ranging from mono- to hexa-nucleotide. Seven microsatellites were polymorphic and 29 were monomorphic within the analyzed isolates. *T. solium* tapeworms were classified into two genetic groups that correlated with the North/South geographic origin of the parasites.

## Conclusions/Significance

The availability of draft genomes for *T. solium* represents a significant step towards the understanding the biology of the parasite. We report here a set of *T. solium* polymorphic microsatellite markers that appear promising for genetic epidemiology studies.

### Author Summary

*Taenia solium*, the pork tapeworm, is an important pathogen as it is a major cause of acquired epilepsy in developing countries. The parasite was eliminated from most developed countries decades ago due to improvement in sanitary conditions but it remains a common infection across Asia, Africa and Latin America. Identification of genetic variants within *T. solium* will enable to study the genetic epidemiology, distribution and movement of this parasite within endemic communities, which will ultimately facilitate the design of control strategies to reduce the health and economic burden of disease.

Microsatellites have been used in other parasites to identify genetic variants. In this study, we partially sequenced the genome of *T. solium* and identified microsatellites widely distributed in the genome using bioinformatics tools. We evaluated the distribution of these microsatellites collected from 20 tapeworms from the north and 20 tapeworms from the south of Peru. We identified seven polymorphic microsatellites, and evaluated their capacity to differentiate genetic variants of *T. solium*. Interestingly, tapeworms from the North and South of Peru showed different genotypes, suggesting its use as a potential marker to differentiate geographic origin.

## Introduction

Cysticercosis is an infection caused by the larval stage of the cestode *Taenia solium*. When the larval stages infect the central nervous system, the infection is known as neurocysticercosis (NCC) and is the most common cause of adult-onset seizures in endemic regions worldwide. Crude estimates of the burden of infection and disease suggest that greater than ten million people have NCC and as many as 2.7–5.6 million suffer from epilepsy [1]. A recent analysis concluded that in Latin America, vast parts of Asia, the Indian subcontinent and Southern China, Sub-Saharan Africa, and Oceania, 29% of all cases of epilepsy are attributable to NCC [2].

Humans are the only known definitive host, harboring the adult tapeworm and releasing infectious eggs to the environment [3]. In pigs that ingest infectious ova or proglottids, the released oncospheres cross the intestinal wall into the circulatory system where they become trapped in the microcapillaries, often in the brain, muscles and subcutaneous tissues. The oncospheres develop into cysticerci (cysts) and if present in the parenchyma of the brain, seizures and epilepsy may occur as a result of host inflammation against the cysts.

Understanding the genetic variation of *T. solium* has the potential to improve our knowledge of the biology, epidemiology, infectivity, and pathogenicity of this parasite in endemic regions [4–7]. Moreover, analysis of the genetic variation within and between different geographical populations can provide information on evolution [8], genetic differentiation and speciation of parasites [9], as well as provide tools for understanding transmission dynamics, which may contribute to public health efforts to control this parasitic infection.

The first attempts at genotyping *Taenia* parasites were directed towards the differentiation of *Taenia* species based on the sequence polymorphism of mitochondrial NADH dehydrogenase 1 and cytochrome c oxidase subunit I (COI) genes using single-strand conformation polymorphism (SSCP) [10]. Restriction fragment length polymorphism (RFLP) also was used to discriminate *Taenia* species by analyzing the ribosomal 5.8S gene sequence as well as the internal transcribed spacer (ITS) [11]. In 2001, Hancock *et al* showed diversity among *T. solium* cysts from different countries using COI, a portion of the ITS1 encoded gene and the diagnostic antigen Ts14. Little genetic diversity within *T. solium* samples collected from South America and Asia was observed. In addition, 15 isolates from Peru had similar COI sequences showing no genetic variability between them [12]. Later, two different worldwide genotypes were reported, with Asian parasites grouped into one cluster, and parasites from Latin America and Africa grouped into another cluster [4]. It has been suggested that the low variation found in *T. solium* isolates may be associated with the limited resolution of the experimental techniques used at that time [8].

More recently, with the development of new DNA analysis tools such as Random Amplification of Polymorphic DNA (RAPD), greater genetic variation has been reported in parasites from communities in Mexico, Honduras and Madagascar [5,13–15]. This data suggests that *T. solium* has local lineages with different genetic characteristics. However, some disadvantages have been reported with RAPD such as low reproducibility, inability to test heterozygosity and subjective interpretation of the data [16,17]. Therefore, a more robust tool with higher resolution is needed to obtain more precise genotyping of *T. solium* isolates.

Microsatellites, or Simple Sequence Repeats (SSR), are repetitive DNA sequences consisting of blocks of 1 to 6 nucleotides repeated up to 60 times [8]. They are highly polymorphic in the number of repeated units. The variation in size of repeat domains is mainly generated by slippage of DNA polymerase during DNA replication, resulting in the insertion or deletion of one or more repeated units [18,19]. Microsatellites have the advantage of being multi-loci and principally neutral markers [19], meaning that unlike protein-encoding genes, they are less likely to be subject to selective pressure. Microsatellites are highly reproducible and specific, and are easily identified from genome sequences by bioinformatics data mining [20–22].

Microsatellite polymorphisms can be detected by polymerase chain reaction (PCR) amplification followed by DNA electrophoresis [8,23]. This technique has been used to analyze genetic variation of other parasites such as *Leishmania* spp. [24], *Schistosoma japonicum* [6], *Trypanosoma cruzi* [25], and *Plasmodium falciparum* [26]. Microsatellite markers also have the advantage of being able to detect greater genetic variation than other genetic markers, as has been demonstrated in *Echinococcus multilocularis* [27]. This work suggests that microsatellite polymorphism analysis is an appropriate tool to differentiate *T. solium* isolates. With the availability of draft genome sequences, the identification of microsatellites is more efficient [20].

Recently, a draft genome of a *T. solium* isolate recovered from Mexico has been published [28]. It is however necessary to have more genomic information available, in order to identify genotyping markers.

In this study we present two draft genome sequences corresponding to *T. solium* specimens from Huancayo (cysts) and Puno (proglottid) from which we identified and characterized microsatellite markers. We explore microsatellite length variability to differentiate *T. solium* isolates from two regions of Peru. To analyze the microsatellites length we used a multi-capillary electrophoresis QIAxcel system that has the advantage of automatized size determination [29]. Although its advantages, this technique is limited by 3–5bp resolution that will not let us differentiate length polymorphism lower than 3–5 bp. The proposed microsatellites will lead to a more comprehensive understanding of the epidemiology of this important human pathogen.

## Materials and Methods

### *Taenia solium* tissue specimens for genome sequencing

Individual cysticerci (cysts) were recovered from a single, naturally infected pig from Huancayo, a city in the central Andean region. One proglottid from Puno (Fig 1) was excised from segments of an adult tapeworm recovered from a single fecal specimen and used for extraction of DNA. To minimize contamination with exogenous materials, the proglottid was washed thoroughly 10 times with phosphate buffer solution (PBS), transported in a mixture of PBS and antibiotics penicillin/streptomycin/ amphotericin B), and stored at -70°C until the DNA was extracted.

### Extraction of genomic DNAs from Huancayo cysts and Puno proglottids

**DNA extraction from the Huancayo cyst sample.** DNA and RNA was extracted simultaneously from *T. solium* Huancayo cysts (named “Huancayo-cyst”) at Rocky Mountain

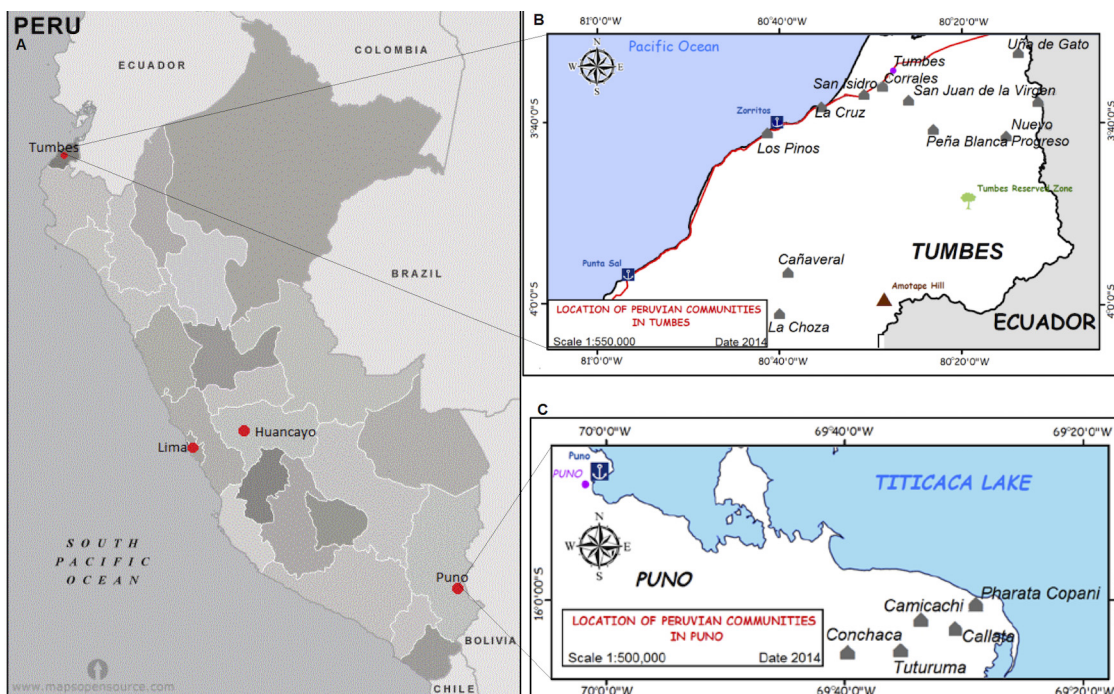

**Fig 1. Map of Peru depicting the location of *T. solium* isolates used for this study.** Map showing the location of Tumbes and Puno, as well as Huancayo (locality of one of the genome source) and Lima, the country’s capital (A). Maps of Tumbes (B) and Puno (C) showing the location of the communities of origin of the tapeworms for this study

doi:10.1371/journal.pntd.0004316.g001



Laboratories (RML) (NIH, NIAID) following the Qiagen AllPrep DNA/RNA Mini kit (Qiagen, Valencia, CA) protocol with the following modifications. Cysts were first frozen in liquid nitrogen and finely ground to a powdery-like texture using a liquid nitrogen chilled mortar and pestle. The ground tissue was transferred to a 1.5 mL Eppendorf tube containing 1.0 mL RLT buffer (cell lysis buffer for DNA/RNA extraction, Qiagen) supplemented with 0.143 M  $\beta$ -mercaptoethanol and allowed to incubate at room temperature for 15 minutes with occasional gentle vortexing. Following the incubation, the extract was homogenized using a QIAshredder spin column (Qiagen) and then purified with AllPrep DNA/RNA kit reagents following the manufacturer's protocol. DNA and RNAs were both eluted twice with 50  $\mu$ l elution buffer per elution. DNA yield and purity was assessed using dsDNA quantitation (Life Technologies, Grand Island, NY) and UV spectrophotometry at A260 nm and A280, respectively. DNA quality was visualized on a 1% agarose gel (Lonza, Rockland, ME). Portions of the DNA samples from the cysts were all pooled into one tube in order to meet quantity and quality thresholds required for downstream Next Generation Illumina sequencing. RNAs were stored at -80°C for future mRNA analyses.

**DNA extraction from the Puno proglottid sample.** DNA was extracted from a *T. solium* proglottid originating from Puno (named "Puno-proglottid") at the Centers for Disease Control and Prevention (CDC). Genomic DNA was extracted using a phenol chloroform extraction method, which included a lysozyme treatment at 37°C for 1 hour to minimize/eliminate bacterial contamination of proglottids, since those were recovered from human feces, followed by incubation with Proteinase K at 56°C overnight. The quantity and quality of the eluted DNA was initially tested by ultraviolet-Vis spectrophotometry (Nanodrop, Thermo Scientific, Newark, DE), and further evaluated with a picogreen kit (Life Technologies, Cat N°P7598) and Biophotometer Plus (Eppendorf), respectively. In addition, for quality analysis, one microliter of the eluted DNA was evaluated by electrophoresis through a 2% agarose gel.

## Next Generation library construction and sequencing procedure

**Sequencing of the Huancayo-cysts.** For the Huancayo-cyst DNA, a paired-end and mate-pair library were constructed separately and run on an Illumina HiSeq 2000 (Illumina Inc, San Diego CA) at RML/NIH. The paired-end library was prepared as follows; one microgram of pooled Huancayo cyst DNA was processed using the TruSeq DNA Sample Preparation Guide, Rev. A., November 2010 (Illumina Inc., San Diego, CA). The resulting library was clustered on a cBot using a paired-end flowcell and sequenced 100 cycles (bases) from both ends. The mate-pair library was prepared and sequenced in the following manner; approximately 4 micrograms of pooled Huancayo-cyst DNA was sheared using a Hydroshear device (Digilab Inc., Marlborough, MA) and processed following the procedure provided in Preparing 2–5kb Samples for Mate Pair Library Sequencing, Rev. B, February 2009 (Illumina Inc., San Diego, CA). The biotin-labeled fragments were electrophoresed on a 0.8% TAE preparatory gel and fragments ranging in size from 2.4 to 4 Kb were excised for the circularization reaction. The resulting library was clustered on a cBot using a paired-end flowcell and sequenced 100 cycles (bases) from both ends.

**Sequencing of the Puno-proglottid.** For the Puno-proglottid DNA a fragment sequencing approach using the 454 GS-FLX+ (Roche Applied Science, Indianapolis, IN) and Illumina Genome Analyzer IIe (Illumina Inc., San Diego, CA) was employed at the CDC. The 454-FLX Titanium shotgun library was prepared as follows; DNA fragments larger than 1.5 Kb were extracted from the Puno proglottid genomic DNA and 500 ng was processed using the procedure in the Rapid Library Preparation Method Manual, GS FLX+ Titanium Series, October 2009 (454 Life Sciences, Branford, CT). For emulsion PCR a 4 copy-per-bead ratio was used to

yield a bead enrichment of 8%. The resulting enriched beads were then sequenced using 454 GS FLX Titanium chemistry. The Illumina fragment library was prepared and sequenced in the following manner: one microgram of Puno proglottid genomic DNA was processed using TruSeq DNA Sample Preparation Guide, Rev. A., November 2010 (Illumina Inc., San Diego, CA). The resulting library was clustered on a cBot using a single-read flowcell and sequenced 100 cycles (bases).

### Huancayo-cyst genome assembly

For the assembly, both the Illumina mate-pair and paired-end sequencing results were combined, providing a total of 878,340,445 usable reads at 100 bp average length. In order to provide the best assembly at an average of 157X coverage and for an expected genome size of 115MB, a subset of 175,931,369 reads were selected for de novo assembly process using Velvet v1.1.05 [30], with the following parameters: coverage cutoff = 10, expected coverage = 26, paired end insert length = 350, and mate paired insert length = 3,500.

### Puno-proglottid genome assembly

For the Puno proglottid genome assembly, both the Illumina mate-pair and the 454 GS FLX raw signals data were processed with the software GS Run Processor to obtain the reads, which were assembled using GS de novo Assembler 2.6 with the following parameters: minimum read length = 20 nucleotides (nt), overlap seed step = 12 nt, overlap seed length = 16 nt, overlap minimum match length = 40 nt, overlap minimum match identity = 90 nt, overlap match identity score = 2 nt, overlap match difference score = -3 nt, all contig threshold = 100 nt, large contig threshold = 500 nt; with an expected depth of 25X. Duplicated reads were used and the assembly was performed 30 times, taking the iteration with the mean number of contigs.

### Cysticercus/proglottid hybrid genome assembly

To generate a more complete *T. solium* genome sequence, we produced a hybrid assembly consisting of the Puno-proglottid fragment 454 reads combined with the Huancayo-cyst Illumina paired-end reads as follows. The hybrid genome was generated using Velvet v1.1.05 de novo assembler using the Puno-proglottid 454 fragment reads, Huancayo-cyst Illumina paired-end reads, and Huancayo-cyst Illumina mate-pair reads. Velvet parameters used are as follows: kmer value = 57, coverage cut-off = 9, expected coverage = 38, paired insert length = 350, and mate pair insert length = 3500.

### Public submission of genomes assemblies

The set of contigs corresponding to the genome of the Huancayo-cysts, the set of contigs corresponding to the assembled genome of the Puno-proglottid and the set of contigs corresponding to the hybrid assembly created from both the Huancayo and Puno tissue genome assemblies is available together at Genbank under the project ID PRJNA183343.

### Identification of microsatellites in the *T. solium* genome

Microsatellites were identified using the script developed by Gur-Arie *et al* [31]. We searched for repetitive motifs of 1–6 bp in our two assembled *T. solium* genomes. A total of 36 distinct microsatellites with polymorphic attributes were selected according to the following criteria: For the Puno-proglottid genome, a first group of microsatellites with a minimum of five motif repetitions were selected. In order to determine if the microsatellites are transcribed, we verified if they were present in the *T. solium* ESTs sequences database available (<http://www.ncbi>.

[nlm.nih.gov/nucest/?term=%22Taenia+solium%22%5Bporgn%3A\\_txid6204%5D](http://nlm.nih.gov/nucest/?term=%22Taenia+solium%22%5Bporgn%3A_txid6204%5D)), which later was included in the published *T. solium* genome sequence [28]. In order to determine if the microsatellites are comprised within a coding region, we verified the presence of an ORF using the algorithm ORF-Finder (<http://www.ncbi.nlm.nih.gov/gorf/gorf.html>). Microsatellites that showed differences in the number of repeats between the Puno-proglottid genome and the ESTs database were selected for further analysis. We verified that conserved flanking regions were present in both the Puno-proglottid genome and the ESTs database. Five microsatellites (TS\_SSR01 to T S\_SSR05) were selected. In addition, 8 of the longest microsatellite sequences from the Puno-proglottid genome not present in the ESTs database also were selected (TS\_SSR06 to TS\_SSR13). Because this first group of microsatellites was biased based on their availability in ESTs, it is less likely that they are neutral.

A second group of microsatellites was identified in the Puno-proglottid genome and mapped into the corresponding contigs of the Huancayo cyst genome. 200 microsatellites (100 di-nucleotides and 100 tri-nucleotides) with the largest repetitive motif in both genomes were evaluated. After aligning the sequences we selected the largest sequences that showed polymorphisms in the repetitive sequences between both genomes (13–18 repeats). This resulted in additional 23 microsatellite loci for testing.

**Primer design for microsatellite amplification.** In order to prevent any bias due to the assembly of a consensus genome that does not account for the intrinsic genomic variability due to the diplodism of *T. solium* and the potentially different sources of infection giving raise to the multiple cysticercus processed to obtain DNA, we directly determined the size of the microsatellites after the individual amplification in each sample. Specific primers were designed against the conserved flanking sequences of each microsatellite. The Primer3 program was used with the following parameters: 20 bp length, 50% GC and 50°C T<sub>m</sub> [32].

**Tapeworm specimens.** A total of 40 *T. solium* adult tapeworm specimens were randomly and anonymously selected from the repository of the Cysticercosis Working Group in Peru. Isolates came from different communities from the northern city of Peru, Tumbes (N = 20) and the southern city of Peru, Puno (N = 20) (Table 1). The geographical distribution of the collected *T. solium* tapeworm isolates is shown in Fig 1. Tapeworms were stored in 25% glycerol supplemented with penicillin (1000 UI/mL) and Gentamycin (100 µg/mL) at 4°C until use.

**DNA purification and PCR amplification of microsatellite loci.** DNA purification was performed using the QIAmp DNA Mini Kit (QIAGEN) according to manufacturer's instructions. DNA was quantified by UV spectrophotometry (Nanodrop) and stored at -20°C until use. The PCR reaction volume (25 µL) consisted of: Buffer 1X (Promega), 2.5 mM MgCl<sub>2</sub>, 0.2 mM dNTPs each one, Forward primer: 1 µmol, Reverse primer: 1 µmol and 20 ng of DNA, Taq polymerase 1 U. PCR was conducted in a MJ Research MiniCycler PTC-150 thermocycler with a hot cover using the following temperature profile except where otherwise stated: the initial denaturation step was at 94°C for 4 minutes, followed by 30 cycles of 94°C for 1 minute, 55–65°C for 1 minute and 72°C for 1 minute and a final extension at 72°C for 10 minutes. Microsatellite markers were analyzed in a multi-capillary electrophoresis QIAxcel system using the QIAxcel high-resolution kit with the OM700 method [29]. 25 bp–500 bp ladder was used as a size marker for the assignment of the allele sizes using the system's software. As a control and in order to verify reproducibility, we amplified the microsatellite TS\_SSR01 in four independent replicates from 9 DNA samples.

**Association analysis of microsatellite polymorphism with geographic location.** In order to determine an association between the geographic origins of the tapeworms with the specific microsatellites, we performed a Fischer's exact test to evaluate the independence between the alleles identified in each microsatellite and the north/south geographic origin.

**Table 1. Origin of *T. solium* tapeworm isolates for the evaluation of microsatellites.**

| Tapeworm ID | Community         | Populations †                    | Region |
|-------------|-------------------|----------------------------------|--------|
| 6           | San Isidro        | Cruz-Isidro-pinos                | Tumbes |
| 39          | San Isidro        | Cruz-Isidro-pinos                | Tumbes |
| 28          | San Isidro        | Cruz-Isidro-pinos                | Tumbes |
| 38          | La Cruz           | Cruz-Isidro-pinos                | Tumbes |
| 7           | Los Pinos         | Cruz-Isidro-Pinos                | Tumbes |
| 19          | Tumbes            | Tum-Corrales-San Juan-PenaBlanca | Tumbes |
| 31          | Tumbes            | Tum_corrales-san juan_PenaBlanca | Tumbes |
| 20          | Corrales          | Tum_corrales-san juan_PenaBlanca | Tumbes |
| 27          | Corrales          | Tum_corrales-san juan_PenaBlanca | Tumbes |
| 11          | Corrales          | Tum_corrales-san juan_PenaBlanca | Tumbes |
| 12          | Fuerte 5 de Julio | Tum_corrales-san juan_PenaBlanca | Tumbes |
| 5           | San Juan—Virgen   | Tum_corrales-san juan_PenaBlanca | Tumbes |
| 25          | Peña Blanca       | Tum_corrales-san juan_PenaBlanca | Tumbes |
| 18          | La Choza          | Cañaverall—Choza                 | Tumbes |
| 24          | Cañaverall        | Cañaverall—Choza                 | Tumbes |
| 14          | Pueblo Nuevo      | Uñagato-progreso-pueblonuevo     | Tumbes |
| 36          | Pueblo Nuevo      | Uñagato-progreso-pueblonuevo     | Tumbes |
| 8           | Nuevo Progreso    | Uñagato-progreso-pueblonuevo     | Tumbes |
| 35          | Nuevo Progreso    | Uñagato-progreso-pueblonuevo     | Tumbes |
| 13          | Uña de Gato       | Uñagato-progreso-pueblonuevo     | Tumbes |
| 40          | Pharata           | Fharata                          | Puno   |
| 1           | Pharata           | Fharata                          | Puno   |
| 30          | Pharata           | Fharata                          | Puno   |
| 17          | Pharata           | Fharata                          | Puno   |
| 21          | Pharata           | Fharata                          | Puno   |
| 34          | Pharata           | Fharata                          | Puno   |
| 3           | Callata           | Callata                          | Puno   |
| 9           | Callata           | Callata                          | Puno   |
| 10          | Callata           | Callata                          | Puno   |
| 29          | Callata           | Callata                          | Puno   |
| 4           | Callata           | Callata                          | Puno   |
| 15          | Camicachi         | Camicachi                        | Puno   |
| 33          | Camicachi         | Camicachi                        | Puno   |
| 37          | Camicachi         | Camicachi                        | Puno   |
| 23          | Camicachi         | Camicachi                        | Puno   |
| 32          | Camicachi         | Camicachi                        | Puno   |
| 16          | Conchaca          | Conchaca_Tuturuma                | Puno   |
| 2           | Conchaca          | Conchaca_Tuturuma                | Puno   |
| 26          | Conchaca          | Conchaca_Tuturuma                | Puno   |
| 22          | Tuturuma          | Conchaca_Tuturuma                | Puno   |

† Populations are the groups that were formed by proximity for the phylogenetic analysis

doi:10.1371/journal.pntd.0004316.t001

### Ethics statement

*Taenia solium* cysts were excised in a previous study from a naturally infected pig in a Huan-cayo local abattoir. The pig was bought by the study team at market price so the study team owned the animal. Procedures were approved by Universidad Peruana Cayetano Heredia



(UPCH) ethics committee for animal use *T. solium* proglottid specimens were collected in previous studies by the Cysticercosis Working Group in Peru, with approval of the UPCH IRB (IRB00001014); they were used as residual diagnostic samples.

## Results

### Analysis of genomic assemblies

Sequencing of the Huancayo-cyst genome produced a total of 175,931,369 reads that were assembled into 18,361 contigs (the largest contig was 307,365 bp). The estimated genome size was 114,605,177 nt. The sequencing of the Puno-proglottid genome produced a total of 76,625,473 reads that were assembled in 47,475 contigs (the largest contig was 79,438 nt). The lack of large contigs in this assembly is due to the lack of paired-end sequencing data. The estimated size of the Puno-proglottid genome was 109,898,809 nt. For the hybrid cyst/proglottid assembly, 7,979 contigs were obtained, and the largest contig had 395,362 nt. The estimated size of the hybrid genome was 111,029,218 nt. These and other statistics were calculated with the program multifastats.py v1.4 ([https://github.com/lbbm-upch/multifastats\\_v1.4](https://github.com/lbbm-upch/multifastats_v1.4)), and are summarized in Table 2. As expected due to their closeness, the Peruvian *T. solium* genomes showed a similar size as the recently published Mexican *T. solium* genome (122.3 Mb), as well as the genomes of *E. granulosus* (114.9 Mb), and *E. multilocularis* (115 Mb) [28].

### Identification of microsatellites

We identified 9,129 microsatellite sequences distributed in the *T. solium* Puno-proglottid genome and 9,936 in the Huancayo-cyst Genome (Table 3). In both the Puno and Huancayo genomes, the greatest number of microsatellite loci found contained di-nucleotides repeats. Most of these microsatellites were over-represented in the forms of AC/GT and AG/CT, while the forms AT/AT and CG/CG showed a lower frequency of occurrence (S1 Table).

### Microsatellite PCR and polymorphism analysis

Thirty-six microsatellites markers were identified as potentially polymorphic. We successfully amplified 34 microsatellite markers in 40 *T. solium* tapeworm specimens. The estimated size of the PCR products of the microsatellites in the tapeworm isolates was similar to the expected theoretical sizes.

**Table 2. *Taenia solium* genomes assemblies' statistics.**

|                       | CDC             | NIH           | Hybrid                        | Hybrid                     |
|-----------------------|-----------------|---------------|-------------------------------|----------------------------|
|                       | Puno proglottid | Huancayo Cyst | Cyst/proglottid (all contigs) | Cyst/proglottid (GenBank)† |
| Total sequenced bases | 109,898,809     | 114,605,177   | 116,668,703                   | 111,029,218                |
| Contigs               | 47,475          | 18,361        | 19,727                        | 7,979                      |
| GC%                   | 42.96           | 42.83         | 42.86                         | 42.80                      |
| N50                   | 4,839           | 39,744        | 46,836                        | 43,923                     |
| Shortest contig (nt)  | 287             | 51            | 51                            | 1000                       |
| Largest contig (nt)   | 79,438          | 307,365       | 395,362                       | 39,5362                    |
| Mean contig length    | 2,314.9         | 6,241.8       | 5,914.2                       | 13,915.2                   |

Statistics of the hybrid genome are shown for the full version and for the set of contigs uploaded to GenBank

†Only contigs larger than 1000bp were submitted

doi:10.1371/journal.pntd.0004316.t002

**Table 3. Frequency of microsatellites per type found in *T. solium* partial Genome 1 and partial Genome 2.**

| Number of nucleotides | Range of repeats | Number of microsatellites |             |
|-----------------------|------------------|---------------------------|-------------|
|                       |                  | Genome 1                  | Genome 2    |
| Total bp analyzed     |                  | 109,898,809               | 114,605,177 |
| Mono nucleotide       | 10 to 53         | 2,298                     | 2,737       |
| Di nucleotide         | 6 to 38          | 3,393                     | 3,537       |
| Tri nucleotide        | 5 to 28          | 2,393                     | 3,464       |
| Tetra nucleotide      | 5 to 28          | 889                       | 1,044       |
| Penta nucleotide      | 5 to 18          | 123                       | 122         |
| Hexa nucleotide       | 5 to 10          | 33                        | 32          |
| Total                 |                  | 9,129                     | 9,936       |

doi:10.1371/journal.pntd.0004316.t003

Within the tested sample, twenty-seven microsatellite markers were monomorphic, of which 26 were homozygous (only one band was observed in the electrophoretic pattern) and 1 was heterozygous (TS\_SSR31, in which two bands were observed in all samples). Seven microsatellite markers were polymorphic containing a total of 44 alleles within the polymorphic loci (Table 4). All 40 tapeworms were homozygous for five markers (TS\_SSR09, TS\_SSR16, TS\_SSR18, TS\_SSR27, and TS\_SSR28), while some were heterozygous for TS\_SSR01 and TS\_SSR32 (S2 Table). The number of alleles varied from 4 for locus TS\_SSR16 to 10 for locus TS\_SSR32 with an average of 6 alleles per locus. The polymorphic information content (PIC) varied from 0.472 for locus TS\_SSR16 to 0.843 for locus TS\_SSR28 with an average of 0.604 per locus (Table 4).

The reproducibility analysis of TS\_SSR01 amplification showed a variability of 1–2 bp between the four replicas in the nine isolates tested (S3 Table), which is lower than the range of resolution reported by the manufacturer (3–5 bp). The variability of TS\_SSR01 size between the different *T. solium* isolates appeared as 2–15 bp, which is three fold higher than the experimental error reported by the manufacturer (S3 Table).

Only TS\_SSR01 was found to be present in the EST database. However the comprising region did not show evidence of any ORF. Therefore TS\_SSR01 is part of a transcribed but not-translated sequence. When we compared TS\_SSR01 against the complete no-redundant nucleotide collection of Genbank using blastn, only one sequence from the close organism *T. asiatica* appeared similar.

### Association of microsatellite polymorphism with the geographic origin of tapeworms

The genetic diversity observed in isolates from the southern city of Puno (20 different genotypes) was slightly higher than that the genetic diversity observed in the isolates from the northern city Tumbes (16 different genotypes). Also the median number of alleles was slightly higher (Table 5). The single microsatellite that best differentiated tapeworms from Tumbes and Puno isolates was TS\_SSR01. Most of the isolates from Tumbes (17/20) were associated to genotype A (206/206 bp) and 3/20 of isolates were associated to genotype B (211/211 bp), all of them homozygous. A lower prevalence of genotype A was observed in Puno (6/20) compared to Tumbes ( $P = 0.001$ , Fisher's exact test). A similar prevalence of genotype B (2/20) was observed in Puno. Five other genotypes were found only in Puno (S2 Table).

### Discussion

The present study describes the draft genome sequences of two *T. solium* isolates and the identification and characterization of DNA microsatellites. The *T. solium* microsatellites reported

**Table 4. Characteristics of microsatellite loci evaluated.**

| Microsatellite | Primer sequences (5'-3')                    | Repetition motif | Observed size (bp) | Number of Alleles | PIC ± |
|----------------|---------------------------------------------|------------------|--------------------|-------------------|-------|
| TS_SSR_01      | ACCGGTGGTTCGGAATTATTA GTTCTTGCTGAGGTGGTTCC  | (CCATT)          | 206–226            | 5                 | 0.582 |
| TS_SSR_02      | CTCCGTGTCTTGACAGCAAA TGACGAAATGGAACAGTGGGA  | (ATGA)           | 190                | 1                 | -     |
| TS_SSR_03      | TTTCAAGCACGTGTCAGCAT GCTGGCAGACAGTGAGTAGG   | (CATT)           | 155                | 1                 | -     |
| TS_SSR_04      | CAGATGAGGGGATGATGCTT GAACGATCCCAACCTCCATA   | (GTT)            | 180                | 1                 | -     |
| TS_SSR_05      | GGGAAAAATGCAGTTTCAGAGC GGTCTGATGCGAGGTCTAGG | (TAA)            | 197                | 1                 | -     |
| TS_SSR_06      | GACCAAGCCCAACACCTCTA CAAGAATGAACGGGAGCAAC   | (GGTA)           | 177                | 1                 | -     |
| TS_SSR_07      | GCACACAACTGGTCACTCG TGCTATGCGTTTGCTTGTTT    | (CAAT)           | –                  | -                 | -     |
| TS_SSR_08      | TCGTCAGTGTGGGAGAGTGA TGGTTGGATTTGTGCTTTGA   | (ACG)            | –                  | -                 | -     |
| TS_SSR_09      | AAGCCAATGGTGACCAAGAG GCCAGCATAGAAGAGCCTGT   | (GGT)            | 166–178            | 5                 | 0.534 |
| TS_SSR_10      | CGACTCACGGCATTTCATCTA TCCAAGACCCTGTGAAATCC  | (GT)             | 220                | 1                 | -     |
| TS_SSR_11      | TCATCTTCCCCGTAAGGCTA AACTCGAAGCGCAGTGTTT    | (GA)             | 181                | 1                 | -     |
| TS_SSR_12      | ATCTCGACAGGCTCGAGTTC TCCGAACAGCTTCGAGTTTT   | (TG)             | 192                | 1                 | -     |
| TS_SSR_13      | GTAGCGGTAACGGAGTGAGG TCAGGCTGGTAACGTGTCAG   | (GT)             | 202                | 1                 | -     |
| TS_SSR_14      | AGCCGGTCTCAGTTGATTG AATGCACTCATGCCATCTCA    | (TG)             | 162                | 1                 | -     |
| TS_SSR_15      | GAAAAGAACGGCATGCAAAT GTTTGGCCATTTTGCCTCTA   | (AT)             | 165                | 1                 | -     |
| TS_SSR_16      | CGCTGGACTAGGGTCAATA CAGCAGAACAACAGCACCAT    | (GT)             | 160–166            | 4                 | 0.472 |
| TS_SSR_17      | GCATTCGAGGATGAATGAT CGTTTTTCTGCACACTTGGA    | (CA)             | 160                | 1                 | -     |
| TS_SSR_18      | AGTTAGCGTGCTTGCTTGGT ATTCCTGTTGCAACCTCCAC   | (GT)             | 168–180            | 6                 | 0.638 |
| TS_SSR_19      | TCCCTTACACCCCTTACAGTC AAAGGCGGTAGATTGTGTGC  | (TG)             | 163                | 1                 | -     |
| TS_SSR_20      | GGCCATTCAGTACCAACCAT TGTGCATGCCATTGTATGTG   | (CT)             | 154                | 1                 | -     |
| TS_SSR_21      | CTATGCCACACCCAACAATG GGCCTCAAGATCACTCGTC    | (GT)             | 187                | 1                 | -     |
| TS_SSR_22      | CCTATTCCACTGGGGTGATG TCGATGAGCTTGCTGTATGTG  | (TG)             | 178                | 1                 | -     |
| TS_SSR_23      | CCTTTTTCGGTGAAGTCGAT GCCTCCTTACACATGCAA     | (CA)             | 209                | 1                 | -     |
| TS_SSR_24      | CCCCATTTCTGTTTCTCT GCGGTGGCAATATAAGCATT     | (CT)             | 144                | 1                 | -     |
| TS_SSR_25      | AGGTGGCGTTATGAATCAGC GCAAACCATCGGATAAAGGA   | (AC)             | 174                | 1                 | -     |
| TS_SSR_26      | CGGTTTGCTTTTATGCCAAT AAATGGTCGCTGAAATGAC    | (GAA)            | 165                | 1                 | -     |
| TS_SSR_27      | GAGGTCTCGCTCATCAAAG TTTCCACTCCAAAACTCG      | (GAA)            | 158–176            | 5                 | 0.546 |
| TS_SSR_28      | TGACGCTGGTAAGCTGTTT GGAACCTTGGCAGAGATAG     | (GTA)            | 202–226            | 9                 | 0.843 |
| TS_SSR_29      | AAAGATGGACGGAAACAGGA GTTGGACGGAGATGTGTGTG   | (AGG)            | 187                | 1                 | -     |
| TS_SSR_30      | TGACGTGTGTCAGGTAGGA CGCATAGCCAGTACTTGTTC    | (TCC)            | 190                | 1                 | -     |
| TS_SSR_31      | GGTTGCTTTTGCTTGTCTC CACTCTCCACGAGTCCACAA    | (TGA)            | 157/179            | 1                 | -     |
| TS_SSR_32      | TGACGTTAACGAGGGTGTG AGATCTCGCTTGAACAAT      | (AGC)            | 177–210            | 10                | 0.617 |
| TS_SSR_33      | CCAGCGCATATTACAAAGG ACTCAAAGCGCCGAAATTA     | (AGG)            | 130                | 1                 | -     |
| TS_SSR_34      | ATCACTCCTGTCCCAACTGC GGGTCGATTGGTCAGAGAAA   | (CCT)            | 182                | 1                 | -     |
| TS_SSR_35      | GGGCGTGAACCTGAATAAAA GGGGCAGACAAGTGAAAAAG   | (CCA)            | 170                | 1                 | -     |
| TS_SSR_36      | GCCCTGATTGTTGCTTTTGT AACGACACGCGGAAAATATC   | (TCT)            | 175                | 1                 | -     |

± PIC was calculated only for polymorphic microsatellites

doi:10.1371/journal.pntd.0004316.t004

**Table 5. General characteristics of polymorphic microsatellites by region.**

| Region | Number of isolates | Number of polymorphic loci | Median number of alleles per locus | Total number of different genotypes |
|--------|--------------------|----------------------------|------------------------------------|-------------------------------------|
| Tumbes | 20                 | 7                          | 3                                  | 16                                  |
| Puno   | 20                 | 7                          | 5                                  | 20                                  |

doi:10.1371/journal.pntd.0004316.t005

here were found to be distributed along the entire genome. The length polymorphism of microsatellites was analyzed for its association with the geographic origin of tapeworm isolates. We found novel microsatellites that were able to differentiate tapeworms between the northern and southern regions of Peru.

Microsatellites have proven to be highly informative in population genetic studies in several parasites [6,33]. In the particular case of *T. solium*, the use of microsatellite markers allows a way to define the genetic structure of populations and to conduct genetic epidemiology studies. Although previous studies have shown a moderate genetic diversity of *T. solium* [4,9,10,34] and particularly in Peru [12], the novel microsatellites we identified here have demonstrated the capacity to differentiate tapeworms from Tumbes in the north and Puno in the south of Peru.

Although the frequency of microsatellites and their coverage in the genome varies considerably between organisms, the number of microsatellites found in *T. solium* (between 9,000–10,000) is similar to the number of microsatellites identified in other parasites [21,35].

Although most of the microsatellite sequences were found in non-transcribed regions, we found that *T. solium* microsatellites could also be present in transcribed/non-translated regions, being the abundance in non-transcribing regions higher than in transcribed/non-translated regions. This result is consistent with previous studies that reported that microsatellites are more abundant in non-coding regions of eukaryotic organisms [36]. The relatively low abundance of microsatellites in transcribed/non-translated as well as in coding regions could be explained by a negative selection against mutations that change the function by altering the secondary structure of the transcribed sequence or by altering the reading frame of the genes [36,37].

Eukaryote microsatellite loci typically contain between 5 and 40 repeats, similar to what we found in *T. solium*. As in other organisms, the number of microsatellites in *T. solium* decreases as the size of the repeat unit increases [38,39]. It is important to highlight that the distribution of the repeat types (mono- to hexa-nucleotide) varies across different taxa, and it has been suggested that this variation is associated with to the interaction of the mutation and the differential selection pressure [37].

As previously reported in other species, we found that dinucleotide repeats motifs were the most abundant type in *T. solium*, which tend to be longer in non-coding regions. This seems to be explained by the negative selection pressure of polymerase slippage during replication of coding DNA [40]. Castagnone—Serenio *et al.* reported that in nematodes, (AT)<sub>n</sub> was the most common microsatellite motif [35]. We found the AC / GT dinucleotide motif to be the most abundant in *T. solium*, which concordantly has also been found to be common in most vertebrates and arthropods [41].

The genetic variability observed in this study may be explained by several factors, including migration of humans and pigs, mutations in the tapeworm genome, cross-fertilization of tapeworms in the intestine in cases where multiple tapeworm infections occur [42,43], among others.

It is important to note that although the low resolution of QIAxcel system reported by the company (3–5bp), the range of difference in the size of TS SSR01 between the north and south region of Peru, is 2–3 fold higher than the expected error (5–15 bp) and the results of the repeatability assay showed lower variability (1–2 bp). This evidence supports the main finding of having TS SSR01 as a polymorphic marker able to differentiate tapeworms from the north and south region of Peru.

Transmission dynamics are not fully understood, although genetic characterization by means of microsatellite genotyping may unveil details of the ecology of *T. solium*. The use of molecular characterization by means of microsatellites will potentially allow identification of

genetic links between tapeworms, larval cysts found in infected pigs and eggs in soil or fomites. Furthermore, microsatellites would help disentangle the genetic complexity of a population due to the introduction of external tapeworms from immigrant tapeworm-carriers. This method of genotyping also has implications in the evaluation of parasite control by identifying the source of infection, and the re-introduction routes of the parasite into a specific region.

In conclusion, this study describes the identification and application of microsatellite markers in *T. solium* genotyping. The novel microsatellites reported here would be an important tool for future studies of the genetic variability of *T. solium*, including population genetics, basic epidemiology, super infections with more than one strain, and tracking the transmission of cysticercosis.

## Supporting Information

**S1 Table. Relative frequency of different motifs in each type of microsatellites: mono-, di- and tri- nucleotides in the partial genomes of *Taenia solium*.**

(DOCX)

**S2 Table. Genotype of the 40 *Taenia solium* isolates for each polymorphic microsatellite marker.**

(DOCX)

**S3 Table. Repeatability assay of microsatellite TS\_SSR01.**

(DOCX)

## Acknowledgments

We thank our UPCH students Katherine Lozano, Sebastian Carrasco, Basilio Cieza, Vladimir Espinoza, Eduardo Gushiken, and Bryan Lucero for their participation in the initial bioinformatics exploratory analysis. We are grateful to Dr. Seth O'Neal for his valuable and helpful comments regarding the manuscript and to Eng. Carmen Gamero Huamán for creating the maps of the communities presented in this article.

## Members of the Cysticercosis Working Group in Peru

Victor C.W. Tsang, PhD (Coordination Board); Silvia Rodríguez, MSc; Isidro González, MD; Herbert Saavedra, MD; Manuel Martínez, MD; Manuel Alvarado, MD (Instituto Nacional de Ciencias Neurológicas, Lima, Perú); Manuela Verástegui, PhD; Javier Bustos, MD, MPH; Holger Mayta, PhD; Cristina Guerra, PhD; Yesenia Castillo, MSc; Yagahira Castro, MSc (Universidad Peruana Cayetano Heredia, Lima, Perú); María T. López, DVM, PhD; César M. Gavidia, DVM, PhD (School of Veterinary Medicine, Universidad Nacional Mayor de San Marcos, Lima, Perú); Luz M. Moyano, MD; Viterbo Ayvar, DVM (Cysticercosis Elimination Program, Tumbes, Perú); John Noh, BS and Sukwan Handali, MD (CDC, Atlanta, GA); Jon Friedland (Imperial College, London, UK).

## Author Contributions

Conceived and designed the experiments: MJP HHG RHG SP MZ. Performed the experiments: MJP ME PS. Analyzed the data: MJP ME AG SM TN HHG RHG SP MZ. Contributed reagents/materials/analysis tools: PS AG PW HHG RHG MZ. Wrote the paper: MJP ME DR FG VC SM PW TN AG HHG RHG SP MZ. Sequenced and assembled the genomes: ED DR MR MF SS VC SA DB. Identified microsatellites: FG ME MJP MZ.



## References

1. Coyle CM, Mahanty S, Zunt JR, Wallin MT, Cantey PT, White AC Jr, et al. Neurocysticercosis: neglected but not forgotten. *PLoS Negl Trop Dis*. 2012; 6: e1500. doi: [10.1371/journal.pntd.0001500](https://doi.org/10.1371/journal.pntd.0001500) PMID: [22666505](https://pubmed.ncbi.nlm.nih.gov/22666505/)
2. Ndimubanzi PC, Carabin H, Budke CM, Nguyen H, Qian YJ, Rainwater E, et al. A systematic review of the frequency of neurocysticercosis with a focus on people with epilepsy. *PLoS Negl Trop Dis*. 2010; 4: e870. doi: [10.1371/journal.pntd.0000870](https://doi.org/10.1371/journal.pntd.0000870) PMID: [21072231](https://pubmed.ncbi.nlm.nih.gov/21072231/)
3. Flisser A. Taeniasis and cysticercosis due to *Taenia solium*. *Prog Clin Parasitol*. 1994; 4: 77–116. PMID: [7948938](https://pubmed.ncbi.nlm.nih.gov/7948938/)
4. Nakao M, Okamoto M, Sako Y, Yamasaki H, Nakaya K, Ito A. A phylogenetic hypothesis for the distribution of two genotypes of the pig tapeworm *Taenia solium* worldwide. *Parasitology*. 2002; 124: 657–662. PMID: [12118722](https://pubmed.ncbi.nlm.nih.gov/12118722/)
5. Vega R, Pintero D, Ramanankandrasana B, Dumas M, Bouteille B, Fleury A, et al. Population genetic structure of *Taenia solium* from Madagascar and Mexico: implications for clinical profile diversity and immunological technology. *Int J Parasitol*. 2003; 33: 1479–1485. PMID: [14572511](https://pubmed.ncbi.nlm.nih.gov/14572511/)
6. Shrivastava J, Qian BZ, Mcvean G, Webster JP. An insight into the genetic variation of *Schistosoma japonicum* in mainland China using DNA microsatellite markers. *Mol Ecol*. 2005; 14: 839–849. PMID: [15723675](https://pubmed.ncbi.nlm.nih.gov/15723675/)
7. Campbell G, Garcia HH, Nakao M, Ito A, Craig PS. Genetic variation in *Taenia solium*. *Parasitol Int*. 2006; 55 Suppl: S121–6. PMID: [16352464](https://pubmed.ncbi.nlm.nih.gov/16352464/)
8. Barker GC. Microsatellite DNA: a tool for population genetic analysis. *Trans R Soc Trop Med Hyg*. 2002; 96 Suppl 1: S21–4. PMID: [12055841](https://pubmed.ncbi.nlm.nih.gov/12055841/)
9. Ito A, Yamasaki H, Nakao M, Sako Y, Okamoto M, Sato MO, et al. Multiple genotypes of *Taenia solium*—ramifications for diagnosis, treatment and control. *Acta Trop*. 2003; 87: 95–101. PMID: [12781383](https://pubmed.ncbi.nlm.nih.gov/12781383/)
10. Gasser RB, Zhu X, Woods W. Genotyping *Taenia* tapeworms by single-strand conformation polymorphism of mitochondrial DNA. *Electrophoresis*. 1999; 20: 2834–2837. PMID: [10546815](https://pubmed.ncbi.nlm.nih.gov/10546815/)
11. Mayta H, Talley A, Gilman RH, Jimenez J, Verastegui M, Ruiz M, et al. Differentiating *Taenia solium* and *Taenia saginata* infections by simple hematoxylin-eosin staining and PCR-restriction enzyme analysis. *J Clin Microbiol*. 2000; 38: 133–137. PMID: [10618076](https://pubmed.ncbi.nlm.nih.gov/10618076/)
12. Hancock K, Broughel DE, Moura IN, Khan A, Pieniazek NJ, Gonzalez AE, et al. Sequence variation in the cytochrome oxidase I, internal transcribed spacer 1, and Ts14 diagnostic antigen sequences of *Taenia solium* isolates from South and Central America, India, and Asia. *Int J Parasitol*. 2001; 31: 1601–1607. PMID: [11730787](https://pubmed.ncbi.nlm.nih.gov/11730787/)
13. Maravilla P, Souza V, Valera A, Romero-Valdovinos M, Lopez-Vidal Y, Dominguez-Alpizar JL, et al. Detection of genetic variation in *Taenia solium*. *J Parasitol*. 2003; 89: 1250–1254. PMID: [14740922](https://pubmed.ncbi.nlm.nih.gov/14740922/)
14. Maravilla P, Gonzalez-Guzman R, Zuniga G, Peniche A, Dominguez-Alpizar JL, Reyes-Montes R, et al. Genetic polymorphism in *Taenia solium* cysticerci recovered from experimental infections in pigs. *Infect Genet Evol*. 2008; 8: 213–216. doi: [10.1016/j.meegid.2007.11.006](https://doi.org/10.1016/j.meegid.2007.11.006) PMID: [18243817](https://pubmed.ncbi.nlm.nih.gov/18243817/)
15. Bobes RJ, Fragoso G, Reyes-Montes Mdel R, Duarte-Escalante E, Vega R, de Aluja AS, et al. Genetic diversity of *Taenia solium* cysticerci from naturally infected pigs of central Mexico. *Vet Parasitol*. 2010; 168: 130–135. doi: [10.1016/j.vetpar.2009.11.001](https://doi.org/10.1016/j.vetpar.2009.11.001) PMID: [19963321](https://pubmed.ncbi.nlm.nih.gov/19963321/)
16. Speijer H, Savelkoul PH, Bonten MJ, Stobberingh EE, Tjhie JH. Application of different genotyping methods for *Pseudomonas aeruginosa* in a setting of endemicity in an intensive care unit. *J Clin Microbiol*. 1999; 37: 3654–3661. PMID: [10523569](https://pubmed.ncbi.nlm.nih.gov/10523569/)
17. Wassenaar TM, Newell DG. Genotyping of *Campylobacter* spp. *Appl Environ Microbiol*. 2000; 66: 1–9. PMID: [10618195](https://pubmed.ncbi.nlm.nih.gov/10618195/)
18. Schlotterer C, Tautz D. Slippage synthesis of simple sequence DNA. *Nucleic Acids Res*. 1992; 20: 211–215. PMID: [1741246](https://pubmed.ncbi.nlm.nih.gov/1741246/)
19. Schlotterer C. Evolutionary dynamics of microsatellite DNA. *Chromosoma*. 2000; 109: 365–371. PMID: [11072791](https://pubmed.ncbi.nlm.nih.gov/11072791/)
20. Madesis P, Ganopoulos I, Tsafaris A. Microsatellites: evolution and contribution. *Methods Mol Biol*. 2013; 1006: 1–13. doi: [10.1007/978-1-62703-389-3\\_1](https://doi.org/10.1007/978-1-62703-389-3_1) PMID: [23546780](https://pubmed.ncbi.nlm.nih.gov/23546780/)
21. Sharma PC, Grover A, Kahl G. Mining microsatellites in eukaryotic genomes. *Trends Biotechnol*. 2007; 25: 490–498. PMID: [17945369](https://pubmed.ncbi.nlm.nih.gov/17945369/)
22. Novelli VM, Cristofani-Yaly M, Bastianel M, Palmieri DA, Machado MA. Screening of genomic libraries. *Methods Mol Biol*. 2013; 1006: 17–24. doi: [10.1007/978-1-62703-389-3\\_2](https://doi.org/10.1007/978-1-62703-389-3_2) PMID: [23546781](https://pubmed.ncbi.nlm.nih.gov/23546781/)

23. Oura CA, Odongo DO, Lubega GW, Spooner PR, Tait A, Bishop RP. A panel of microsatellite and minisatellite markers for the characterisation of field isolates of *Theileria parva*. *Int J Parasitol.* 2003; 33: 1641–1653. PMID: [14636680](#)
24. Russell R, Iribar MP, Lambson B, Brewster S, Blackwell JM, Dye C, et al. Intra and inter-specific microsatellite variation in the *Leishmania subgenus Viannia*. *Mol Biochem Parasitol.* 1999; 103: 71–77. PMID: [10514082](#)
25. Oliveira RP, Broude NE, Macedo AM, Cantor CR, Smith CL, Pena SD. Probing the genetic population structure of *Trypanosoma cruzi* with polymorphic microsatellites. *Proc Natl Acad Sci U S A.* 1998; 95: 3776–3780. PMID: [9520443](#)
26. Su X, Wellem TE. Toward a high-resolution *Plasmodium falciparum* linkage map: polymorphic markers from hundreds of simple sequence repeats. *Genomics.* 1996; 33: 430–444. PMID: [8661002](#)
27. Nakao M, Sako Y, Ito A. Isolation of polymorphic microsatellite loci from the tapeworm *Echinococcus multilocularis*. *Infect Genet Evol.* 2003; 3: 159–163. PMID: [14522179](#)
28. Tsai IJ, Zarowiecki M, Holroyd N, Garciarubio A, Sanchez-Flores A, Brooks KL, et al. The genomes of four tapeworm species reveal adaptations to parasitism. *Nature.* 2013; 496: 57–63. doi: [10.1038/nature12031](#) PMID: [23485966](#)
29. Dean DA, Wadl PA, Hadziabdic D, Wang X, Trigiano RN. Analyzing microsatellites using the QIAxcel system. *Methods Mol Biol.* 2013; 1006: 223–243. doi: [10.1007/978-1-62703-389-3\\_16](#) PMID: [23546795](#)
30. Zerbino DR, Birney E. Velvet: algorithms for de novo short read assembly using de Bruijn graphs. *Genome Res.* 2008; 18: 821–829. doi: [10.1101/gr.074492.107](#) PMID: [18349386](#)
31. Gur-Arie R, Cohen CJ, Eitan Y, Shelef L, Hallerman EM, Kashi Y. Simple sequence repeats in *Escherichia coli*: abundance, distribution, composition, and polymorphism. *Genome Res.* 2000; 10: 62–71. PMID: [10645951](#)
32. Rozenand S, Skaletsky H. Primer3 on the WWW for General Users and for Biologist Programmers. In: Krawets S, Misener S, editors. *Bioinformatics Methods and Protocols*. Totowa, NJ: Humana Press; 2000. pp. 365–386.
33. Xiao N, Remais J, Brindley PJ, Qiu D, Spear R, Lei Y, et al. Polymorphic microsatellites in the human bloodfluke, *Schistosoma japonicum*, identified using a genomic resource. *Parasit Vectors.* 2011; 4: 13-3305-4-13.
34. Gasser RB, Chilton NB. Characterisation of taeniid cestode species by PCR-RFLP of ITS2 ribosomal DNA. *Acta Trop.* 1995; 59: 31–40. PMID: [7785524](#)
35. Castagnone-Sereno P, Danchin EG, Deleury E, Guillemaud T, Malausa T, Abad P. Genome-wide survey and analysis of microsatellites in nematodes, with a focus on the plant-parasitic species *Meloidogyne incognita*. *BMC Genomics.* 2010; 11: 598-2164-11-598.
36. Metzgar D, Bytof J, Wills C. Selection against frameshift mutations limits microsatellite expansion in coding DNA. *Genome Res.* 2000; 10: 72–80. PMID: [10645952](#)
37. Li YC, Korol AB, Fahima T, Beiles A, Nevo E. Microsatellites: genomic distribution, putative functions and mutational mechanisms: a review. *Mol Ecol.* 2002; 11: 2453–2465. PMID: [12453231](#)
38. Temnykh S, DeClerck G, Lukashova A, Lipovich L, Cartinhour S, McCouch S. Computational and experimental analysis of microsatellites in rice (*Oryza sativa L.*): frequency, length variation, transposon associations, and genetic marker potential. *Genome Res.* 2001; 11: 1441–1452. PMID: [11483586](#)
39. Grover A, Sharma PC. Microsatellite motifs with moderate GC content are clustered around genes on *Arabidopsis thaliana* chromosome 2. *In Silico Biol.* 2007; 7: 201–213. PMID: [17688446](#)
40. Dokholyan NV, Buldyrev SV, Havlin S, Stanley HE. Distributions of dimeric tandem repeats in non-coding and coding DNA sequences. *J Theor Biol.* 2000; 202: 273–282. PMID: [10666360](#)
41. Toth G, Gaspari Z, Jurka J. Microsatellites in different eukaryotic genomes: survey and analysis. *Genome Res.* 2000; 10: 967–981. PMID: [10899146](#)
42. Jeri C, Gilman RH, Lescano AG, Mayta H, Ramirez ME, Gonzalez AE, et al. Species identification after treatment for human taeniasis. *Lancet.* 2004; 363: 949–950. PMID: [15043964](#)
43. Yanagida T, Carod JF, Sako Y, Nakao M, Hoberg EP, Ito A. Genetics of the pig tapeworm in madagascar reveal a history of human dispersal and colonization. *PLoS One.* 2014; 9: e109002. doi: [10.1371/journal.pone.0109002](#) PMID: [25329310](#)
